# Supplementary material
Source: Springer Nature journal article supplement (https://www.springermedizin.de/resource/supplementary/12913_2009_1329_MOESM1_ESM.pdf/9527888)
Supplement: MOESM1 [file 9527888]

All patients with inpatient codes for diabetic foot infection  
N=61,007

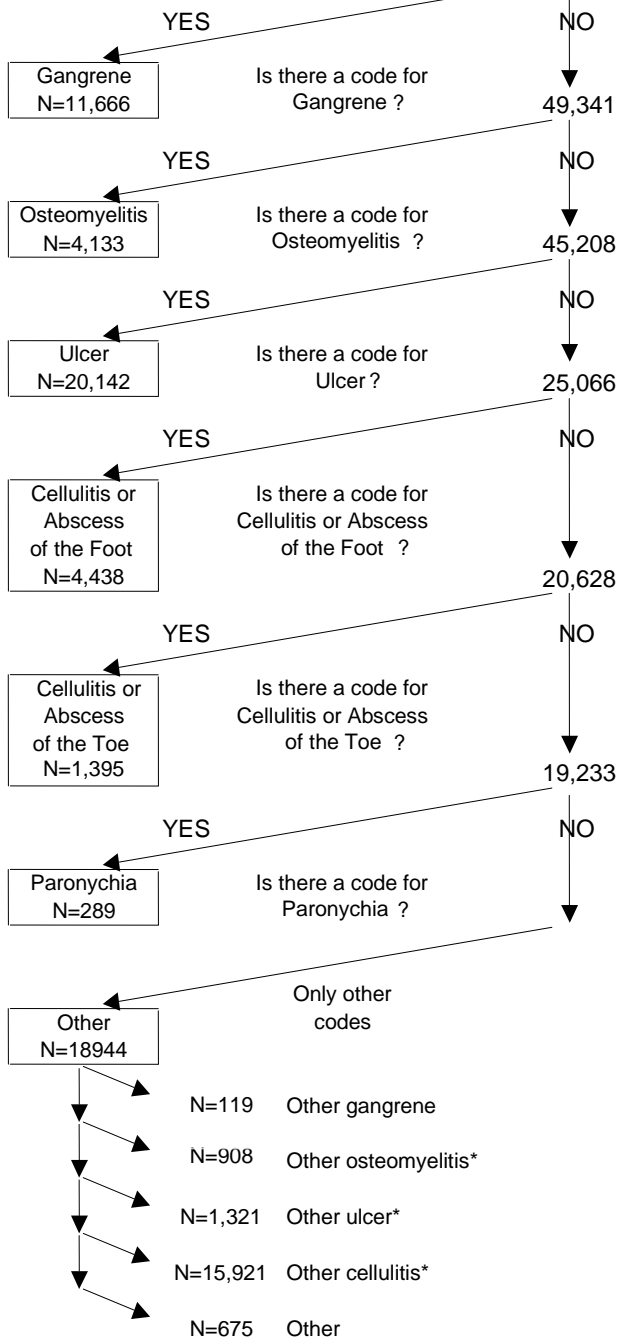

\* of lower limbs not specific to foot.
